# Supplementary material for: Achievement of narrow-band blue-emitting phosphors KScSr1−yCaySi2O7:Bi3+ by the migration of luminescence centers
Source: Royal Society of Chemistry journal article supplement (doi:10.1039/d1ra01375k), 2021-01-01
Supplement: d1ra01375k1.pdf [file d1ra01375k1.pdf]

Table S1. Variation of Debye temperature in different sites

|                                                                          | Site K   | Site Sr  |
|--------------------------------------------------------------------------|----------|----------|
| $U_{iso}$ (KSSS: $0.07\text{Bi}^{3+}$ ) <sup>+</sup>                     | 0.0397   | 0.0242   |
| $U_{iso}$ (KSS <sub>0.6</sub> C <sub>0.4</sub> S: $0.07\text{Bi}^{3+}$ ) | 0.0419   | 0.0121   |
| $\theta_{D,i}$                                                           | increase | decrease |
| Local structural rigidity                                                | reduce   | improve  |

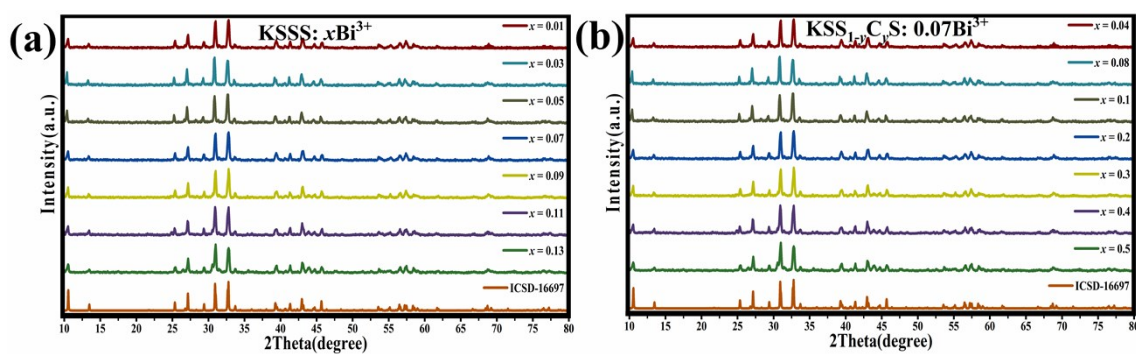

Figure S1. XRD patterns and the standard of KScSrSi<sub>2</sub>O<sub>7</sub> (ICSD-166997): (a) KSSS: Bi<sup>3+</sup> (0 < x < 0.13) ; (b) KSS<sub>1-y</sub>C<sub>y</sub>S: 0.07Bi<sup>3+</sup> (0 < y < 0.5).

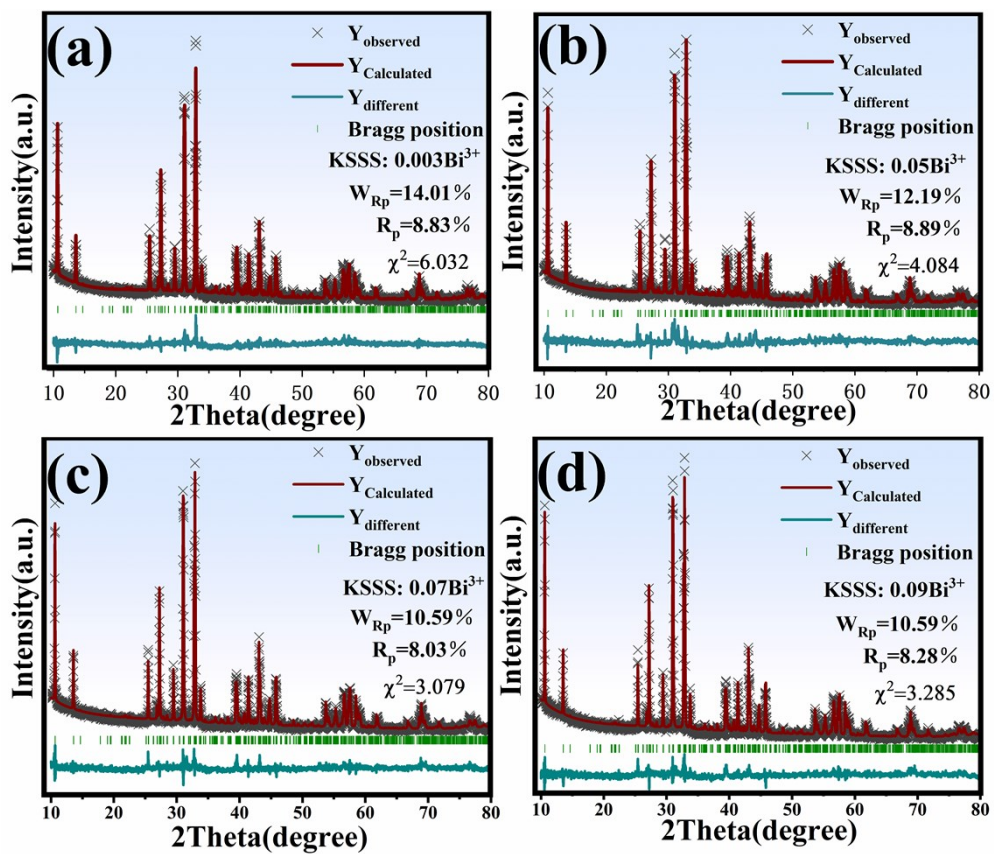

Figure S2. Rietveld refinement results of KSSS:  $x\text{Bi}^{3+}$  with (a)  $x = 0.003$ , (b)  $x = 0.05$ , (c)  $x = 0.07$ , (d)  $x = 0.09$ .

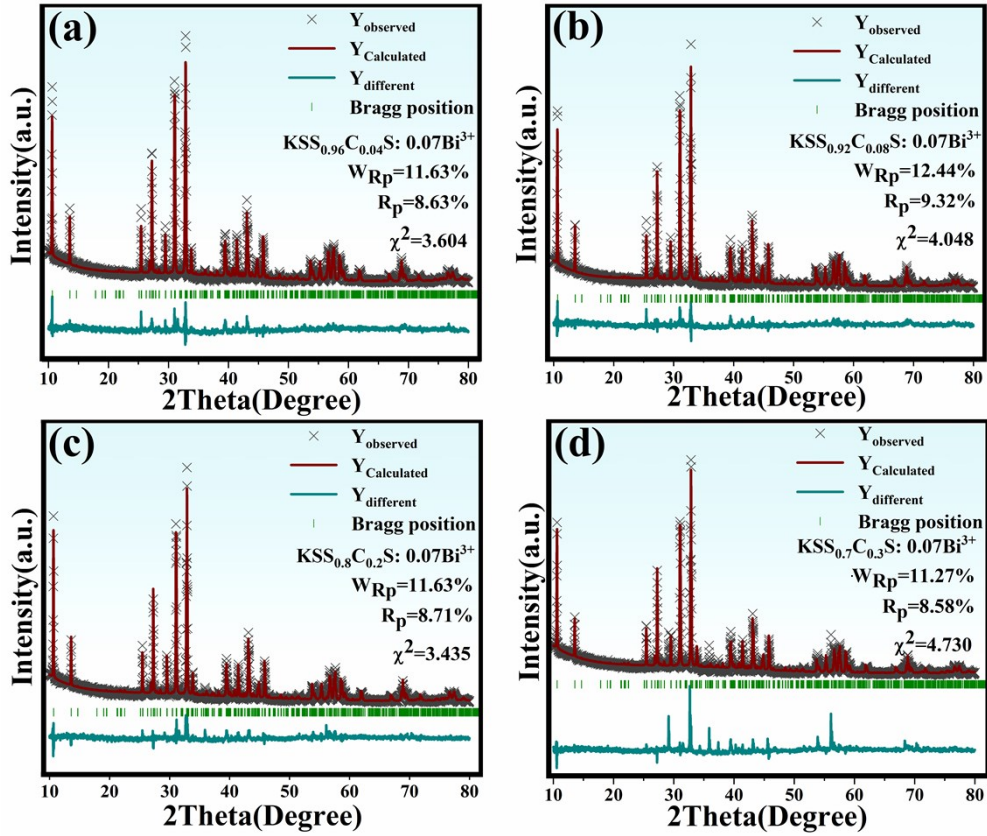

Figure S3. Rietveld refinement results of  $\text{KSS}_{1-y}\text{C}_y\text{S}: 0.07\text{Bi}^{3+}$  with (a)  $y = 0.04$ , (b)  $y = 0.08$ , (c)  $y = 0.2$ , (d)  $y = 0.3$ .

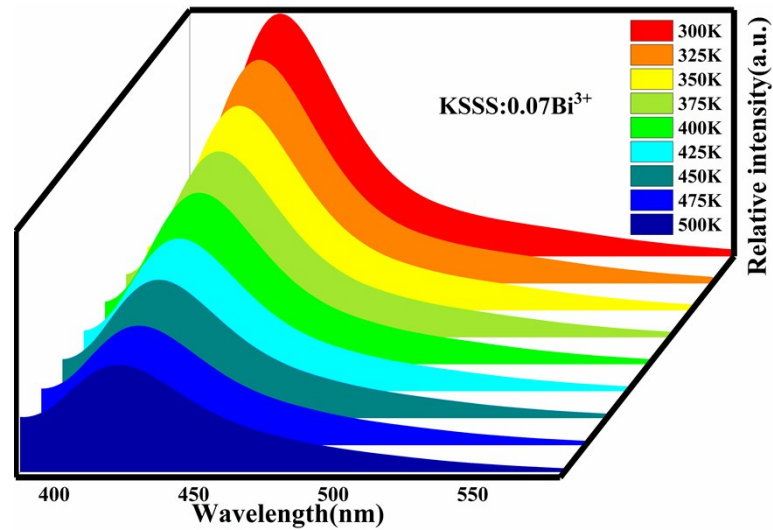

Figure S4. Temperature-dependent emission spectra of  $\text{KSSS}: 0.07\text{Bi}^{3+}$  phosphors under 370 nm excitation.

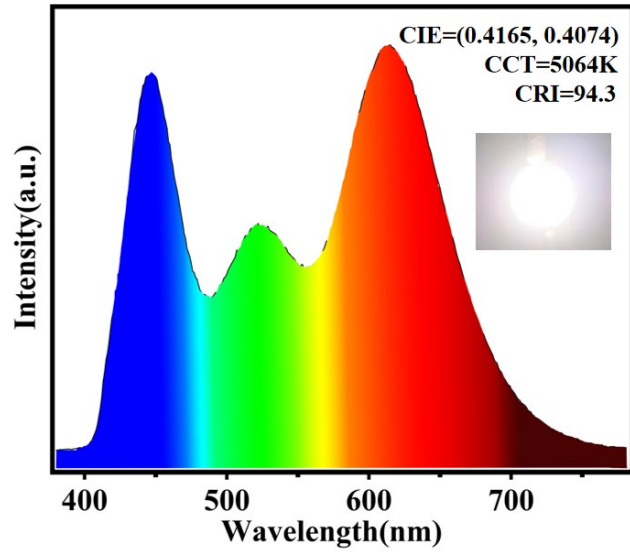

Figure S5. The EL spectrum of the LED device fabricated with the blue  $\text{BaMgAl}_{10}\text{O}_{17}:\text{Eu}^{2+}$  phosphor and the commercial phosphor on an UV LED chip (370 nm) under a current of 5 mA.
